# Supplementary material for: Development and Characterization of Phage-Display-Derived Novel Human Monoclonal Antibodies against the Receptor Binding Domain of SARS-CoV-2
Source: MDPI journal article supplement (doi:10.3390/biomedicines10123274), 2022-12-17
Supplement: s1 [file s1]

**Supplementary Table S1. Histopathological evaluation and scoring of lungs from the SARS-CoV-2-infected K18-hACE2 mice model.**

| Pathological score | Number of specimen (n = 5) |                   |
|--------------------|----------------------------|-------------------|
|                    | PBS                        | K102.1 (30 mg/kg) |
| 0                  | 0                          | 1 (20%)           |
| 0.5                | 0                          | 2 (40%)           |
| 1                  | 2 (40%)                    | 2 (40%)           |
| 1.5                | 1(20%)                     | 0                 |
| 2                  | 2 (40%)                    | 0                 |
| Mean*              | 1.5                        | 0.6               |

\*Mean = (pathological score × numbers of specimen)/total numbers of specimen

Pathological score = (0, 0%; 1, ≤10%; 2, 10%-50%; 3, ≥50%; +0.5, pulmonary edema or alveolar hemorrhage)

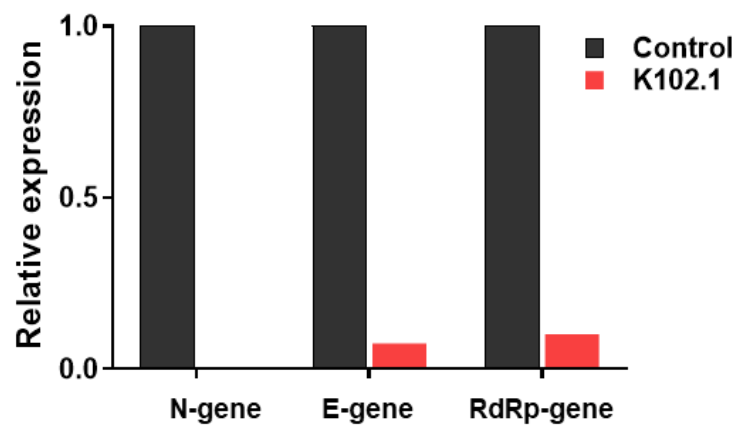

**Supplementary figure 1. Neutralizing effect of selected mAb against wild-type SARS-CoV-2 live viral infection *in vitro*.** Relative expression of the N, E, and RdRp gene was individually quantified using RT-qPCR in the absence (black) or presence (red) of 5 nM K102.1 at 120 h after wild-type SARS-CoV-2 infection in Vero E6 cells.

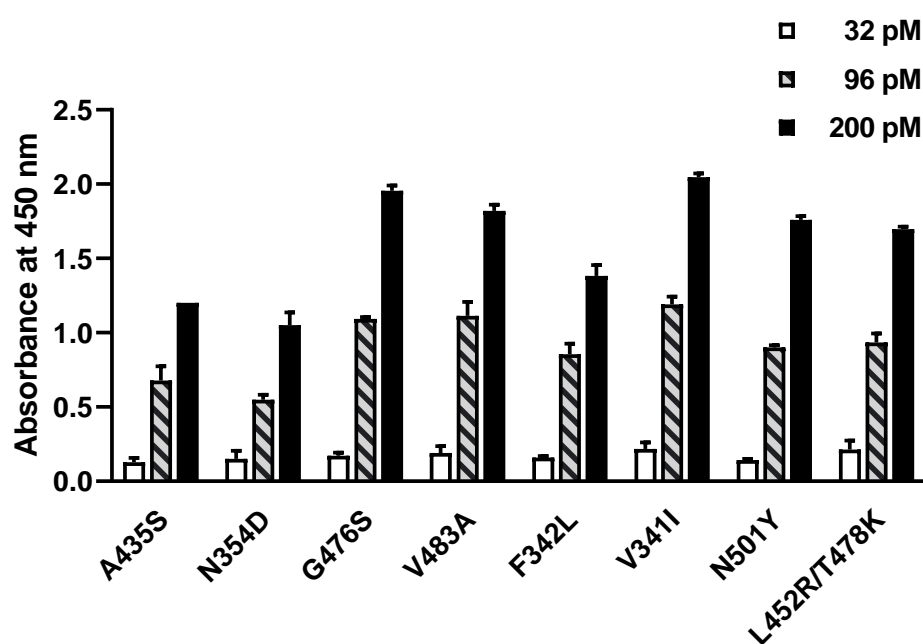

**Supplementary figure 2. Detection of multiple SARS-CoV-2 RBD antigens using developed sandwich ELISA.** The detection ability of the sandwich ELISA was evaluated against the increasing concentrations of the RBDs of SARS-CoV-2 variants, including A435S, N354D, G476S, V483A, F432L, V341I, N501Y (Alpha), and L454R/T478K (Delta). All values represented as mean  $\pm$  SD of duplicate measurements and represent one out of two independent experiments.
